# Supplementary material
Source: PubMed Central journal article supplement (PMC4097649)
Supplement: IAI.01133-13_zii007140744so1.pdf [file IAI.01133-13_zii007140744so1.pdf]

## Supplementary data

**Table S1. Dynamics of modulation of leukocyte inflammatory gene expression by *L. panamensis***

| Symbol | GenBank accession No. | Fold change gene expression compared to control group <sup>a</sup><br>Average fold change (range) |                        |
|--------|-----------------------|---------------------------------------------------------------------------------------------------|------------------------|
|        |                       | 2h <sup>b</sup> (n=2)                                                                             | 24h <sup>c</sup> (n=2) |
| C5     | NM_001735             | 1,15 (0,61 - 1,68)                                                                                | 0,79 (0,73 - 0,84)     |
| C5AR1  | NM_001736             | 2,92 (2,33 - 3,51)                                                                                | 1,68 (1,03 - 2,33)     |
| CCBP2  | NM_001296             | 0,66 (0,12 -1,21)                                                                                 | 1,08 (0,86 - 1,29)     |
| CCL11  | NM_002986             | 1,09 (0,68 - 1,50)                                                                                | 0,8 (0,46 - 1,13)      |
| CCL13  | NM_005408             | 0,53 (0,02 - 1,03)                                                                                | 2,65 (2,03 - 3,28)     |
| CCL15  | NM_032965             | 0,31 (0,22 - 0,40)                                                                                | 0,55 (0,50 - 0,60)     |
| CCL16  | NM_004590             | 0,48 (0,37 - 0,59)                                                                                | 0,41 (0,30 - 0,52)     |
| CCL17  | NM_002987             | 0,17 (0,09 - 0,24)                                                                                | 2,11 (0,35 - 3,87)     |
| CCL18  | NM_002988             | 3,25 (0,85 - 5,66)                                                                                | 8,59 (1,85 - 15,32)    |
| CCL19  | NM_006274             | 0,29 (0,08 - 0,32)                                                                                | 1,63 (0,98 - 2,28)     |
| CCL2   | NM_002982             | 2,45 (0,26 - 4,64)                                                                                | 11,72 (9,18 - 14,2)    |
| CCL3   | NM_002983             | 13,41 (3,61 -23,2)                                                                                | 7,04 (2,22 - 11,8)     |
| CCL4   | NM_002984             | 15,34 (3,95 -26,7)                                                                                | 2,58 (1,77 - 3,38)     |
| CCL5   | NM_002985             | 0,50 (0,47 - 0,53)                                                                                | 0,99 (0,80 - 1,18)     |
| CCL7   | NM_006273             | 23,22 (12,0 - 34,4)                                                                               | 61,9 (37,4 - 86,4)     |
| CCL8   | NM_005623             | 0,48 (0,03 -0,94)                                                                                 | 6,36 (0,42 - 12,31)    |
| CCR1   | NM_001295             | 2,04 (0,79 - 3,30)                                                                                | 2,64 (2,23 - 3,06)     |
| CCR10  | NM_016602             | 1,88 (1,57 - 2,20)                                                                                | 0,82 (0,64 - 0,99)     |
| CCR2   | NM_001123396          | 0,03 (0,02 - 0,04)                                                                                | 0,07 (0,07 - 0,08)     |
| CCR3   | NM_001837             | 0,46 (0,4 - 0,5)                                                                                  | 0,40 (0,26 - 0,54)     |
| CCR4   | NM_005508             | 1,88 (1,62 - 2,13)                                                                                | 1,00 (0,86 - 1,13)     |
| CCR5   | NM_000579             | 0,32 (0,24 - 0,46)                                                                                | 1,66 (1,07 - 2,24)     |
| CCR6   | NM_004367             | 2,63 (2,30 - 2,96)                                                                                | 1,14 (1,14 - 1,14)     |
| CCR7   | NM_001838             | 1,03 (0,94 -1,12)                                                                                 | 1,11 (0,83 - 1,38)     |
| CCR8   | NM_005201             | 1,01 (0,96 - 1,06)                                                                                | 1,01 (0,64 - 1,33)     |
| CCRL1  | NM_016557             | 0,57 (0,56- 0,58)                                                                                 | 1,09 (0,98 - 1,20)     |
| CCRL2  | NM_003965             | 2,02 (1,80 -2,24)                                                                                 | 3,82 (2,74 - 4,90)     |
| CKLF   | NM_181641             | 0,56 (0,48 - 0,63)                                                                                | 0,67 (0,53 - 0,80)     |
| CMKLR1 | NM_004072             | 0,04 (0,03 -0,05)                                                                                 | 1,07 (0,67 - 1,46)     |
| CMTM1  | NM_181269             | 0,46 (0,35 - 0,57)                                                                                | 0,51 (0,42 - 0,60)     |
| CMTM2  | NM_144673             | 0,27 (0,17 - 0,28)                                                                                | 0,39 (0,38 -0,41)      |

|        |           |                     |                      |
|--------|-----------|---------------------|----------------------|
| CMTM3  | NM_144601 | 0,46 (0,42 - 0,5)   | 1,07 (0,89 - 1,25)   |
| CMTM4  | NM_178818 | 0,46 (0,30 - 0,62)  | 0,75 (0,69 - 0,82)   |
| CX3CR1 | NM_001337 | 0,55 (0,43 - 0,67)  | 0,58 (0,52 - 0,64)   |
| CXCL1  | NM_001511 | 7,03 (3,21 - 10,8)  | 2,10 (0,68 - 3,51)   |
| CXCL10 | NM_001565 | 0,41 (0,02 - 0,80)  | 4,27 (0,73 - 7,80)   |
| CXCL11 | NM_005409 | 1,13 (0,02 - 2,24)  | 3,13 (0,27 - 6,00)   |
| CXCL13 | NM_006419 | 0,08 (0,05 - 0,1)   | 1,95 (1,83 - 2,06)   |
| CXCL2  | NM_002089 | 4,62 (2,21 - 7,02)  | 2,74 (1,55 - 3,93)   |
| CXCL3  | NM_002090 | 0,85 (0,14 - 1,55)  | 2,98 (1,73 - 4,22)   |
| CXCL5  | NM_002994 | 0,16 (0,09 - 0,23)  | 12,83 (1,63 - 24,04) |
| CXCL6  | NM_002993 | 0,53 (0,25 - 0,81)  | 0,20 (0,16 - 0,23)   |
| CXCL9  | NM_002416 | 0,19 (0,003 - 0,37) | 1,59 (0,80 - 2,38)   |
| CXCR1  | NM_000634 | 1,93 (0,91 - 2,94)  | 0,13 (0,09 - 0,17)   |
| CXCR3  | NM_001504 | 0,92 (0,84 - 0,99)  | 1,01 (0,83 - 1,20)   |
| CXCR4  | NM_003467 | 1,60 (1,18 - 2,02)  | 0,83 (0,65 - 1,00)   |
| CXCR5  | NM_001716 | 1,18 (0,91 - 1,49)  | 0,85 (0,72 - 0,98)   |
| CXCR6  | NM_006564 | 0,77 (0,65 - 0,89)  | 1,13 (0,89 - 1,37)   |
| HIF1A  | NM_001530 | 1,68 (1,49 - 1,93)  | 1,07 (0,74 - 1,40)   |
| IL16   | NM_004513 | 0,47 (0,46 - 0,49)  | 0,84 (0,75 - 0,94)   |
| IL4    | NM_000589 | 2,74 (1,26 - 4,21)  | 0,70 (0,38 - 1,01)   |
| IL8    | NM_000584 | 7,24 (2,57 - 11,9)  | 2,76 (0,94 - 4,57)   |
| TLR2   | NM_003264 | 1,74 (1,69 - 1,78)  | 0,71 (0,63 - 0,78)   |
| TLR4   | NM_138554 | 0,56 (0,00 - 1,12)  | 1,06 (0,85 - 1,20)   |
| TNF    | NM_000594 | 7,04 (4,01 - 10,0)  | 2,26 (1,97 - 2,55)   |
| TYMP   | NM_001953 | 0,69 (0,23 - 1,15)  | 1,92 (1,24 - 2,61)   |
| XCL1   | NM_002995 | 1,07 (0,78 - 1,36)  | 1,36 (0,85 - 1,88)   |
| XCR1   | NM_005283 | 0,83 (0,74 - 0,93)  | 1,89 (1,64 - 2,15)   |

<sup>a</sup> Expression data are shown as a relative quantitation based on gene expression levels of uninfected blood leukocytes from the same donor, calculated as fold change from  $\Delta\Delta C_t$  values.

<sup>b</sup> Total blood leukocytes infected with *L. panamensis* for 2h.

<sup>c</sup> Total blood leukocytes infected with *L. panamensis* for 24h.

<sup>d</sup> Highlighted are genes consistently up-regulated at 2h and 24h of infection in human white blood cells.

**Table S2. Inflammatory gene expression in human macrophages induced by infection with *L. panamensis***

| Symbol            | GenBank accession No. | Fold change gene expression compared to control group <sup>a</sup><br>Average Fold change ± SD |                            |                                      |                                    |
|-------------------|-----------------------|------------------------------------------------------------------------------------------------|----------------------------|--------------------------------------|------------------------------------|
|                   |                       | Self-healing (n=4) <sup>b</sup>                                                                | Chronic (n=5) <sup>c</sup> | Chronic Cutaneous (n=3) <sup>d</sup> | Chronic Mucosal (n=2) <sup>e</sup> |
| ABCF1             | NM_001090             | 1,01 ± 0,09                                                                                    | 1,08 ± 0,18                | 1,11 ± 0,23                          | 1,02 ± 0,13                        |
| BCL6              | NM_001706             | 1,07 ± 0,10                                                                                    | 1,03 ± 0,37                | 1,06 ± 0,32                          | 0,99 ± 0,57                        |
| C3                | NM_000064             | 0,75 ± 0,25                                                                                    | 1,48 ± 0,40                | 1,62 ± 0,26                          | 1,28 ± 0,61                        |
| C4A               | NM_007293             | 1,68 ± 0,78                                                                                    | 1,06 ± 0,12                | 1,06 ± 0,17                          | 1,06 ± 0,03                        |
| C5                | NM_001735             | 1,07 ± 0,54                                                                                    | 0,52 ± 0,31                | 0,47 ± 0,34                          | 0,59 ± 0,38                        |
| CCL1              | NM_002981             | 0,66 ± 0,15                                                                                    | 0,52 ± 0,15                | 0,54 ± 0,18                          | 0,49 ± 0,16                        |
| CCL11             | NM_002986             | 1,07 ± 0,25                                                                                    | 1,75 ± 0,46                | 1,91 ± 0,47                          | 1,51 ± 0,48                        |
| CCL13             | NM_005408             | 1,63 ± 0,70                                                                                    | 4,29 ± 2,79                | 3,88 ± 2,63                          | 4,89 ± 4,01                        |
| CCL15             | NM_032965             | 1,22 ± 0,30                                                                                    | 1,38 ± 0,34                | 1,31 ± 0,44                          | 1,47 ± 0,22                        |
| CCL16             | NM_004590             | 1,43 ± 0,34                                                                                    | 2,48 ± 0,96                | 2,25 ± 0,26                          | 2,83 ± 1,78                        |
| CCL17             | NM_002987             | 1,12 ± 0,50                                                                                    | 1,26 ± 0,34                | 1,24 ± 0,34                          | 1,30 ± 0,46                        |
| CCL18             | NM_002988             | 1,56 ± 0,20                                                                                    | 2,32 ± 0,92                | 2,18 ± 0,74                          | 2,52 ± 1,46                        |
| CCL19             | NM_006274             | 1,41 ± 0,13                                                                                    | 1,68 ± 0,22                | 1,71 ± 0,29                          | 1,64 ± 0,12                        |
| CCL2 <sup>f</sup> | NM_002982             | 1,52 ± 0,78                                                                                    | 6,50 ± 0,92                | 6,80 ± 1,11                          | 6,06 ± 0,50                        |
| CCL20             | NM_004591             | 1,13 ± 0,32                                                                                    | 1,72 ± 0,35                | 1,61 ± 0,32                          | 1,89 ± 0,46                        |
| CCL21             | NM_002989             | 1,50 ± 0,38                                                                                    | 1,89 ± 0,37                | 2,00 ± 0,40                          | 1,72 ± 0,39                        |
| CCL23             | NM_005064             | 0,94 ± 0,15                                                                                    | 0,81 ± 0,21                | 0,89 ± 0,24                          | 0,68 ± 0,11                        |
| CCL24             | NM_002991             | 1,02 ± 0,27                                                                                    | 1,15 ± 0,36                | 1,26 ± 0,31                          | 0,99 ± 0,50                        |
| CCL25             | NM_005624             | 2,13 ± 1,31                                                                                    | 3,62 ± 1,76                | 2,95 ± 0,71                          | 4,62 ± 2,85                        |
| CCL26             | NM_006072             | 1,23 ± 0,46                                                                                    | 1,45 ± 0,28                | 1,46 ± 0,11                          | 1,43 ± 0,54                        |
| CCL3              | NM_002983             | 1,41 ± 0,42                                                                                    | 2,39 ± 0,77                | 2,32 ± 0,48                          | 2,50 ± 1,38                        |
| CCL4              | NM_002984             | 1,29 ± 0,14                                                                                    | 2,36 ± 0,49                | 2,31 ± 0,28                          | 2,43 ± 0,90                        |
| CCL5              | NM_002985             | 0,92 ± 0,14                                                                                    | 0,61 ± 0,17                | 0,61 ± 0,20                          | 0,60 ± 0,18                        |
| CCL7              | NM_006273             | 1,86 ± 1,22                                                                                    | 4,76 ± 1,74                | 4,76 ± 1,91                          | 4,76 ± 2,20                        |
| CCL8              | NM_005623             | 1,88 ± 1,00                                                                                    | 14,15 ± 4,00               | 15,94 ± 4,30                         | 11,47 ± 1,79                       |
| CCR1              | NM_001295             | 1,26 ± 0,42                                                                                    | 2,79 ± 0,26                | 2,97 ± 0,11                          | 2,52 ± 0,08                        |
| CCR2              | NM_001123396          | 1,22 ± 0,78                                                                                    | 0,61 ± 0,14                | 0,69 ± 0,11                          | 0,48 ± 0,03                        |
| CCR3              | NM_001837             | 1,08 ± 0,21                                                                                    | 1,22 ± 0,23                | 1,23 ± 0,23                          | 1,20 ± 0,33                        |
| CCR4              | NM_005508             | 1,16 ± 0,30                                                                                    | 0,74 ± 0,18                | 0,65 ± 0,21                          | 0,86 ± 0,01                        |
| CCR5              | NM_000579             | 1,14 ± 0,21                                                                                    | 2,21 ± 0,17                | 2,21 ± 0,24                          | 2,20 ± 0,02                        |
| CCR6              | NM_004367             | 1,23 ± 0,40                                                                                    | 0,85 ± 0,13                | 0,82 ± 0,13                          | 0,88 ± 0,18                        |

|         |           |             |               |              |               |
|---------|-----------|-------------|---------------|--------------|---------------|
| CCR7    | NM_001838 | 0,89 ± 0,19 | 0,58 ± 0,03   | 0,59 ± 0,02  | 0,55 ± 0,05   |
| CCR8    | NM_005201 | 0,81 ± 0,26 | 0,98 ± 0,33   | 1,00 ± 0,46  | 0,95 ± 0,07   |
| CCR9    | NM_006641 | 1,26 ± 0,75 | 1,23 ± 0,20   | 1,20 ± 0,27  | 1,27 ± 0,08   |
| CEBPB   | NM_005194 | 0,98 ± 0,21 | 0,87 ± 0,17   | 0,81 ± 0,19  | 0,95 ± 0,13   |
| CRP     | NM_000567 | 1,04 ± 0,20 | 1,32 ± 0,51   | 1,40 ± 0,69  | 1,19 ± 0,14   |
| CX3CR1  | NM_001337 | 0,99 ± 0,27 | 0,87 ± 0,29   | 0,93 ± 0,36  | 0,77 ± 0,20   |
| CXCL1   | NM_001511 | 2,01 ± 1,18 | 8,14 ± 1,81   | 8,77 ± 1,31  | 7,18 ± 2,58   |
| CXCL10  | NM_001565 | 1,11 ± 0,13 | 6,10 ± 2,88   | 5,60 ± 2,33  | 6,86 ± 4,53   |
| CXCL11  | NM_005409 | 0,89 ± 0,21 | 4,21 ± 2,15   | 3,64 ± 2,19  | 5,07 ± 2,54   |
| CXCL12  | NM_000609 | 2,97 ± 3,65 | 2,22 ± 0,63   | 2,15 ± 0,79  | 2,34 ± 0,54   |
| CXCL13  | NM_006419 | 1,07 ± 0,23 | 0,68 ± 0,14   | 0,62 ± 0,11  | 0,78 ± 0,16   |
| CXCL14  | NM_004887 | 1,39 ± 0,42 | 2,27 ± 0,69   | 2,03 ± 0,34  | 2,64 ± 1,12   |
| CXCL2   | NM_002089 | 2,37 ± 1,17 | 9,32 ± 2,99   | 11,05 ± 2,26 | 6,74 ± 1,79   |
| CXCL3   | NM_002090 | 2,44 ± 1,27 | 14,72 ± 5,24  | 17,26 ± 4,58 | 10,91 ± 4,42  |
| CXCL5   | NM_002994 | 1,68 ± 1,40 | 10,42 ± 4,95  | 9,91 ± 3,07  | 11,18 ± 8,80  |
| CXCL6   | NM_002993 | 0,95 ± 0,38 | 1,39 ± 0,92   | 1,67 ± 0,74  | 0,96 ± 1,31   |
| CXCL9   | NM_002416 | 0,95 ± 0,08 | 1,40 ± 0,54   | 1,59 ± 0,55  | 1,12 ± 0,54   |
| CARD18  | NM_021571 | 1,20 ± 0,10 | 1,55 ± 0,67   | 1,50 ± 0,82  | 1,63 ± 0,64   |
| IFNA2   | NM_000605 | 1,02 ± 0,23 | 1,15 ± 0,36   | 1,18 ± 0,51  | 1,10 ± 0,09   |
| IL10    | NM_000572 | 1,78 ± 0,12 | 3,99 ± 1,06   | 4,08 ± 1,48  | 3,87 ± 0,37   |
| IL10RA  | NM_001558 | 1,05 ± 0,08 | 1,21 ± 0,18   | 1,31 ± 0,11  | 1,07 ± 0,23   |
| IL10RB  | NM_000628 | 0,81 ± 0,27 | 1,28 ± 0,21   | 1,33 ± 0,25  | 1,20 ± 0,18   |
| IL13    | NM_002188 | 1,56 ± 0,83 | 1,27 ± 0,15   | 1,20 ± 0,17  | 1,36 ± 0,09   |
| IL13RA1 | NM_001560 | 0,76 ± 0,22 | 1,01 ± 0,17   | 1,09 ± 0,17  | 0,89 ± 0,11   |
| IL17C   | NM_013278 | 1,29 ± 0,33 | 1,91 ± 0,37   | 2,01 ± 0,47  | 1,77 ± 0,17   |
| IL1A    | NM_000575 | 0,99 ± 0,20 | 1,39 ± 0,32   | 1,38 ± 0,34  | 1,39 ± 0,42   |
| IL1B    | NM_000576 | 1,58 ± 1,10 | 8,00 ± 7,08   | 6,28 ± 3,27  | 10,59 ± 12,53 |
| IL1F10  | NM_173161 | 0,98 ± 0,28 | 1,14 ± 0,42   | 1,15 ± 0,59  | 1,14 ± 0,01   |
| IL36RN  | NM_012275 | 1,43 ± 0,35 | 2,13 ± 0,60   | 2,28 ± 0,44  | 1,91 ± 0,95   |
| IL36A   | NM_014440 | 1,17 ± 0,10 | 1,32 ± 0,33   | 1,35 ± 0,46  | 1,26 ± 0,03   |
| IL37    | NM_173205 | 1,40 ± 0,31 | 1,70 ± 0,42   | 1,53 ± 0,26  | 1,96 ± 0,61   |
| IL36B   | NM_173178 | 1,33 ± 0,11 | 1,80 ± 0,45   | 1,77 ± 0,11  | 1,84 ± 0,89   |
| IL36G   | NM_019618 | 1,10 ± 0,11 | 1,26 ± 0,22   | 1,15 ± 0,10  | 1,43 ± 0,30   |
| IL1R1   | NM_000877 | 0,95 ± 0,19 | 1,37 ± 0,35   | 1,49 ± 0,44  | 1,20 ± 0,08   |
| IL1RN   | NM_000577 | 1,32 ± 0,36 | 2,20 ± 1,05   | 2,42 ± 0,99  | 1,89 ± 1,46   |
| IL22    | NM_020525 | 1,31 ± 0,86 | 1,15 ± 0,48   | 1,37 ± 0,21  | 0,82 ± 0,68   |
| IL5     | NM_000879 | 1,54 ± 0,88 | 1,30 ± 0,27   | 1,38 ± 0,29  | 1,17 ± 0,26   |
| IL5RA   | NM_000564 | 0,95 ± 0,28 | 0,76 ± 0,22   | 0,72 ± 0,30  | 0,83 ± 0,06   |
| IL8     | NM_000584 | 3,58 ± 3,37 | 19,47 ± 12,01 | 20,19 ± 7,38 | 18,40 ± 21,54 |

|        |           |             |             |             |             |
|--------|-----------|-------------|-------------|-------------|-------------|
| CXCR1  | NM_000634 | 1,24 ± 0,14 | 1,56 ± 0,28 | 1,55 ± 0,36 | 1,59 ± 0,23 |
| CXCR2  | NM_001557 | 0,97 ± 0,27 | 0,78 ± 0,18 | 0,83 ± 0,23 | 0,72 ± 0,10 |
| IL9    | NM_000590 | 2,33 ± 1,81 | 1,35 ± 0,49 | 1,36 ± 0,17 | 1,33 ± 0,95 |
| IL9R   | NM_002186 | 1,33 ± 0,22 | 1,76 ± 0,39 | 1,80 ± 0,23 | 1,69 ± 0,70 |
| LTA    | NM_000595 | 1,25 ± 0,27 | 1,29 ± 0,23 | 1,19 ± 0,17 | 1,43 ± 0,28 |
| LTB    | NM_002341 | 1,04 ± 0,39 | 0,69 ± 0,05 | 0,67 ± 0,05 | 0,72 ± 0,07 |
| LTB4R  | NM_181657 | 1,04 ± 0,40 | 0,55 ± 0,37 | 0,77 ± 0,23 | 0,20 ± 0,25 |
| MIF    | NM_002415 | 1,05 ± 0,13 | 0,98 ± 0,05 | 0,96 ± 0,05 | 1,00 ± 0,06 |
| AIMP1  | NM_004757 | 1,03 ± 0,12 | 1,18 ± 0,17 | 1,27 ± 0,09 | 1,05 ± 0,21 |
| SPP1   | NM_000582 | 0,86 ± 0,34 | 1,02 ± 0,65 | 0,91 ± 0,49 | 1,20 ± 1,04 |
| TNF    | NM_000594 | 1,36 ± 0,22 | 1,95 ± 0,41 | 2,17 ± 0,17 | 1,61 ± 0,47 |
| CD40LG | NM_000074 | 1,28 ± 0,71 | 0,81 ± 0,18 | 0,80 ± 0,16 | 0,82 ± 0,28 |
| TOLLIP | NM_019009 | 1,01 ± 0,17 | 0,93 ± 0,22 | 0,92 ± 0,17 | 0,96 ± 0,37 |
| XCR1   | NM_005283 | 1,66 ± 0,45 | 2,01 ± 0,68 | 1,81 ± 0,15 | 2,30 ± 1,25 |

<sup>a</sup> Expression data are shown as a relative quantitation based on gene expression levels of uninfected macrophages from the same donor, calculated as fold change from  $\Delta\Delta C_t$  values.

<sup>b</sup> Average gene expression induced *L. panamensis* strains isolated from patients with self-healing CL.

<sup>c</sup> Average gene expression induced by *L. panamensis* strains isolated from patients with chronic dermal leishmaniasis.

<sup>d,e</sup> Gene expression induced by *L. panamensis* strains isolated from patients with chronic dermal leishmaniasis, discriminated between strains isolated from patients with chronic cutaneous leishmaniasis (d) and chronic mucosal leishmaniasis (e).

<sup>f</sup> Highlighted are genes whose expression was induced >4 fold upon infection with strains isolated from patients with chronic disease.
